# Supplementary material for: Implementation and effectiveness of a physician-focused peer support program
Source: PLoS One. 2023 Nov 1;18(11):e0292917. doi: 10.1371/journal.pone.0292917 (PMC10619771; doi:10.1371/journal.pone.0292917)
Supplement: S1 File — (XLSX) [file pone.0292917.s002.xlsx]

## Sheet: full data
ID	date	department	age	gender	year_in_practice	awareness	referral_binout	self_referral_binout	department_impact	post_satisfaction	post_program_oe	recommend	barriers_mutli	improvements_for_use_oe	self_burnout	self_post_use	post_interaction_count	helpfulness	helpfulness_oe	post_improvement_perception	additional_resources_binout	comms_comfort	post_interaction_oe	followup_post_oe
1	2022-02-08 13:50:22	Emergency Medicine	50-55	Man	20-30	Yes	Yes	No	Very positive impact	Very satisfied		Yes, would highly recommend				Yes		Very helpful	Having the ability to share experiences about clinical cases or other aspects of our work with someone who innately understands the subtleties and stressors is priceless.	Significant improvement	No		In my case, referral to EAP was not indicated--it was not about a specific clinical case, or particular challenges, per se.
2	2022-03-04 13:59:12	Emergency Medicine	40-45	Woman	10-20	Yes	Yes	Yes	Very positive impact	Very satisfied	its awesome	Yes, would highly recommend	Lack of time;		Moderate	Yes	5+	Very helpful	easy to access, no fear of judgement, feeling of acceptance	Significant improvement	No	It made me much more comfortable talking about my work-related feelings/emotions in general	no	more post
3	2022-03-04 14:21:23	Emergency Medicine	45-50	Man	10-20	Yes	Yes	Yes	Very positive impact	Very satisfied		Yes, would highly recommend	Lack of time;Don't feel like I need it;		Moderate	Yes	1	Very helpful	Felt less alone in my situation	Some improvement	No	It made me much more comfortable talking about my work-related feelings/emotions in general
4	2022-03-04 14:27:25	Emergency Medicine	40-45	Woman	5-10	Yes	Yes	No	Very positive impact	Very satisfied		Yes, would highly recommend	Not comfortable talking about my feelings with colleagues;Lack of time;		High	Yes	2	Very helpful		Some improvement		It made me somewhat more comfortable talking about my work-related feelings/emotions in general
5	2022-03-04 14:33:43	Emergency Medicine	45-50	Woman	20-30	Yes	Yes	No	Very positive impact	Very satisfied		Yes, would highly recommend			Moderate	Yes	1	Very helpful		Some improvement	No	It did not change my comfort talking about my work-related feelings/emotions in general		It is AMAZING
6	2022-03-04 17:53:18	Emergency Medicine	40-45	Man	5-10	Yes	Yes	Yes	Very positive impact	Very satisfied		Yes, would highly recommend	Not comfortable talking about my feelings with colleagues;		Moderate	Yes	1	Helpful	The interaction allowed me to share my thoughts and feelings in a consequence-less environment where judgment and/or next steps were not inevitable. It just helped to feel like a person talking to a knowing friend; I felt less isolated, frustrated, and victimized afterwards.	Some improvement	No	It did not change my comfort talking about my work-related feelings/emotions in general
7	2022-03-04 21:05:03	Emergency Medicine	45-50	Man	10-20	Yes	No	No	Neutral	Neutral		Neutral	Not comfortable talking about my feelings with colleagues;Lack of time;		Moderate	No, a peer supporter has never reached out to me
8	2022-03-05 07:20:01	Emergency Medicine	40-45	Man	5-10	Yes	Yes	No	Neutral	Satisfied		Yes, would recommend	Lack of time;Privacy concerns;Med-Legal concerns;Don't feel like I need it;Not comfortable talking about my feelings with colleagues;		Low	Yes	1	Somewhat helpful		No change	No	It did not change my comfort talking about my work-related feelings/emotions in general
9	2022-03-05 08:15:12	Emergency Medicine	45-50	Man	5-10	Yes	No	No	Very positive impact	Very satisfied		Yes, would highly recommend	Not comfortable talking about my feelings with colleagues;		Very High	Yes	4	Helpful	Felt warm and fuzzy, some validation, but it’s like eating a candy bar. Tasted good but not much nutritional value. I am someone who may benefit more from tough love?!?	Some improvement	Yes	It made me much more comfortable talking about my work-related feelings/emotions in general
10	2022-03-05 08:53:03	Emergency Medicine	50-55	Man	20-30	Yes	Yes	Yes	Very positive impact	Very satisfied	Lifesaver	Yes, would highly recommend	Not comfortable talking about my feelings with colleagues;		High	Yes	1	Very helpful	Being able to share a traumatic experience with someone who has lived similar experiences was very helpful.	Some improvement	No	It made me somewhat more comfortable talking about my work-related feelings/emotions in general		Thank you so much for bringing us this program!
11	2022-03-05 11:36:28	Emergency Medicine	45-50	Woman	10-20	Yes	Yes	Yes	Very positive impact	Very satisfied	This program works on the micro level with individual physicians as well as on the departmental level in shifting our perceptions of mental health and the impact of the secondary trauma we experience in the field of medicine - it provides action and concrete methods for developing the emotional resilience that allow physicians to continue to practice with their full selves rather than have those …	Yes, would highly recommend	Privacy concerns;	Post supporter selection is absolutely essential - even one supporter who brings a lack of self awareness can inject damaging power differentials, privacy concerns, and true vulnerabilities to the group.	Moderate	Yes	3	Very helpful	Peers have a baseline level of understanding about the level of stress we face as well as an understanding of the specifics of our jobs and self-expectations, department culture, etc. This understanding allowed the supporter to meet me where I was without having to spend emotional effort and energy explaining the setting and background of the specific trauma we met to discuss.	Significant improvement	No	It made me somewhat more comfortable talking about my work-related feelings/emotions in general	On going training of POST supporters is incredibly beneficial - both for techniques and methods but also as additional support for these individuals who have taken on the honor and burden of helping hold emotional experiences for their colleagues.	POST has the potential to positively change the culture of medicine in general - can't say enough positive endorsements of this program!
12	2022-03-05 10:58:09	Emergency Medicine	40-45	Woman	10-20	Yes	Yes	No	Very positive impact	Very satisfied	I love how the program supports our well being as a person, and intentionally does not look to clinical details of patient care. Also amazing how it offers a safe space for anyone and everyone to share.	Yes, would highly recommend	Lack of time;		Low	No, a peer supporter has never reached out to me
13	2022-03-06 06:23:53	Emergency Medicine	40-45	Woman	5-10	Yes	No	No	Very positive impact	Satisfied	I think POST has provided a significant positive impact on our department. I think having the space and the support for peer support has helped many individuals, and has helped our group morale overall (even if I haven't personally used this - knowing it is available and fully supported by our department and medical center is a positive).	Yes, would highly recommend	Lack of time;During most stressful times, I felt too paralyzed to reach out for help. I feel lucky to have peer support outside/in addition to this program that I have benefited from. ;Privacy concerns;		Moderate	No, a peer supporter has never reached out to me
14	2022-03-06 22:23:56	Emergency Medicine	50-55	Man	20-30	Yes	Yes	No	Very positive impact	Very satisfied		Yes, would highly recommend	Don't feel like I need it;		Very Low	No, a peer supporter has reached out to me but I declined
15	2022-03-07 06:54:23	HBS	40-45	Woman	10-20	Yes	No	No	Neutral	Neutral		Neutral	Lack of time;Not comfortable talking about my feelings with colleagues;		Very High	No, a peer supporter has never reached out to me
16	2022-03-07 14:12:55	Emergency Medicine	50-55	Woman	10-20	Yes	Yes	Yes	Very positive impact	Very satisfied		Yes, would highly recommend	Lack of time;		Very High	Yes	2	Very helpful	Very helpful to give me perspective on my fears, thoughts and help me process a very difficult case. I respected their opinions more because they are peers.	Significant improvement	Yes	It made me much more comfortable talking about my work-related feelings/emotions in general
17	2022-03-07 15:07:49	HBS	50-55	Prefer not to say	20-30	Yes	No	No	Neutral	Neutral		Neutral	Not comfortable talking about my feelings with colleagues;		Moderate	No, a peer supporter has reached out to me but I declined
18	2022-03-09 06:58:06	HBS	55-60	Man	20-30	Yes	No	Yes	Very positive impact	Satisfied	It’s a great program to help decompress from the stress of work.	Yes, would highly recommend	Lack of time;	More advertisement of the program (sometimes, I forget about accessing the program, especially when work gets overwhelmingly busy.	Very High	Yes	5+	Very helpful	It’s a chance for us to commiserate.	Some improvement	No	It made me somewhat more comfortable talking about my work-related feelings/emotions in general	I enjoyed the POST sessions a great deal.
19	2022-03-09 08:48:45	Emergency Medicine	45-50	Man	10-20	Yes	No	No	Very positive impact	Very satisfied		Yes, would highly recommend			Low	No, a peer supporter has never reached out to me
20	2022-03-09 08:48:45	Emergency Medicine	45-50	Man	10-20	Yes	Yes	No	Very positive impact	Satisfied	Very positive perception	Yes, would highly recommend	Privacy concerns;	If it grows, consider expanding to other sites--a bit more anonymous	Low	No, a peer supporter has reached out to me but I declined								Super super job getting this developed and standardized
21	2022-03-09 08:48:22	Emergency Medicine	45-50	Woman	10-20	Yes	Yes	Yes	Very positive impact	Very satisfied	please expand it! More departments. More providers.	Yes, would highly recommend	Lack of time;payment for Non physicians;		Moderate	Yes	5+	Very helpful	it's the best support one can ask for, no one understands the trauma truly as much as a colleague	Significant improvement	Yes	It made me much more comfortable talking about my work-related feelings/emotions in general	I would love for it to be more and more normalized.
22	2022-03-09 08:48:43	Emergency Medicine	30-35	Man	0-5	Yes	No	No	Somewhat positive impact	Satisfied		Yes, would recommend	Don't feel like I need it;Not comfortable talking about my feelings with colleagues;		Low	No, a peer supporter has never reached out to me
23	2022-03-09 08:49:10	Emergency Medicine	35-40	Woman	5-10	Yes	Yes	No	Very positive impact	Very satisfied		Yes, would highly recommend	None;		High	Yes	3	Very helpful	My POST peer supporter was a good listener, helped me get out of my head, help me visualize my career in a way I wasn't able to in the mindset I was in at the point. It was invaluable to be able to have a frank discussion with someone who knew exactly what I was going through. I also find it very helpful that these sessions are recognized in a way as tangible as being able to bill for. It makes m…	Some improvement	Yes	It made me somewhat more comfortable talking about my work-related feelings/emotions in general
24	2022-03-09 08:48:52	Emergency Medicine	35-40	Woman	5-10	Yes	No	Yes	Very positive impact	Very satisfied	It creates a culture of support. Makes it okay to ask for help.	Yes, would highly recommend			Moderate	Yes	2	Very helpful	Someone who understands my work and can relate to my experiences is helping me to process.	Some improvement	No	It made me somewhat more comfortable talking about my work-related feelings/emotions in general
25	2022-03-09 08:54:47	Emergency Medicine	50-55	Man	20-30	Yes	No	No	Somewhat positive impact	Satisfied		Yes, would recommend	Lack of time;Privacy concerns;	Scheduling POST time for everyone, instead of having it be an "opt-in" program.	High	No, a peer supporter has never reached out to me
26	2022-03-09 09:12:55	Emergency Medicine	40-45	Man	10-20	Yes	Yes	Yes	Very positive impact	Very satisfied		Yes, would highly recommend	Cultural practice/habit within departments that needs to change;	Peers who model it, normalize its use	Moderate	Yes	5+	Very helpful		Significant improvement	Yes	It made me much more comfortable talking about my work-related feelings/emotions in general
27	2022-03-09 11:17:02	Emergency Medicine	35-40	Woman	5-10	Yes	Yes	No	Somewhat positive impact	Satisfied	Great work! I value and am In awe of all the care and effort that’s been put forth. Would appreciate a growing diversity of thr supporters.	Yes, would highly recommend	I’m fortunate to be able to talk to other nonPOST individuals whom I feel more comfortable with ;	Broader scope of providers	Moderate	No, a peer supporter has never reached out to me
28	2022-03-09 13:28:00	OBGYN	50-55	Woman	10-20	Yes	No	No	Neutral	Neutral		Yes, would recommend	Lack of time;Privacy concerns;		Moderate	Yes	1	Somewhat helpful		No change	No	It did not change my comfort talking about my work-related feelings/emotions in general
29	2022-03-09 13:34:28	OBGYN	40-45	Woman	5-10	Yes	No	No	Neutral	Neutral	Seems like a good resource.	Yes, would recommend	Don't feel like I need it;		Moderate	No, a peer supporter has never reached out to me								Although not through a formal referral to POST, I'm close colleagues with a POST provider and frequently speak with her about issues that arise.
30	2022-03-09 13:22:16	OBGYN	40-45	Woman	5-10	Yes	No	No	Neutral	Neutral		Neutral	Lack of time;	ensuring time off to talk.	Very High	No, a peer supporter has never reached out to me
31	2022-03-09 14:05:31	OBGYN	45-50	Woman	10-20	Yes	No	No	Neutral	Neutral	never actually used it, but the idea is excellent and there is a definite need	Yes, would highly recommend	Lack of time;	time allotted for the program	Moderate	No, a peer supporter has reached out to me but I declined								no
32	2022-03-09 15:12:30	OBGYN	45-50	Woman	10-20	No
33	2022-03-09 16:57:06	OBGYN	50-55	Woman	20-30	Yes	Yes	No	Very positive impact	Very satisfied		Yes, would highly recommend	Lack of time;		Moderate	Yes	2	Very helpful	Having someone reach out after a bad event is very helpful to feel support from colleagues	Significant improvement	Yes	It made me somewhat more comfortable talking about my work-related feelings/emotions in general	Would be great to have "office hours" that we knew we could access people at certain times - contacting the POST leads and then asking to set up a time can be challenging with really short schedules
34	2022-03-10 07:29:25	Emergency Medicine	40-45	Man	10-20	Yes	Yes	No	Somewhat positive impact	Very unsatisfied		Yes, would highly recommend			Low	Yes	1	Helpful		Some improvement	No	It made me somewhat more comfortable talking about my work-related feelings/emotions in general
35	2022-03-10 08:30:52	OBGYN	40-45	Woman	10-20	Yes	No	No	Neutral	Neutral		Neutral	Lack of time;Don't feel like I need it;		Moderate	No, a peer supporter has never reached out to me
36	2022-03-10 08:30:00	Emergency Medicine	35-40	Woman	5-10	Yes	Yes	Yes	Very positive impact	Very satisfied	I think it's a great program with lots of flexibility and excellent providers	Yes, would highly recommend	Lack of time;	a lot of the post providers themselves are super busy. I really hope they get some buy-down so they can make more time in their schedules to speak to people who need support.	High	Yes	4	Very helpful	my supporter is an incredible listener. it also served to validate how I was feeling in terms of burnout and not wanting to work in the ER. just to have a sounding board who truly understands what it is to feel the work pressures, low morale at work, negative interactions with colleagues/nurses/patients - it felt very validating to be understood. also her advice was excellent and I think back to …	Significant improvement	No	It made me somewhat more comfortable talking about my work-related feelings/emotions in general	I think this is an incredible program, thank you for starting it. I have had some bad things happen in the last few years and have spoken with EAP and had my own KP therapist who I speak to on and off (he sometimes signs off on me and tells me to get back in touch when I need him). the one constant has been my post supporter. and in many ways it has been the easiest therapeutic relationship to ha…
37	2022-03-10 10:08:30	Anesthesia	30-35	Woman	5-10	No
38	2022-03-10 10:16:20	Anesthesia	40-45	Woman	10-20	Yes	No	No	Neutral	Neutral		Neutral	Lack of time;Don't feel like I need it;		High	No, a peer supporter has never reached out to me
39	2022-03-10 10:15:56	Anesthesia	30-35	Woman	0-5	yes	No	No	Somewhat positive impact	Satisfied		Yes, would recommend	Privacy concerns;Not comfortable talking about my feelings with colleagues;		Low	Yes	1	Somewhat helpful	It was nice to feel supported. I wasn't incredibly distressed by the situation in question though, so it wasn't really necessary for someone to reach out to me.	No change	No	It did not change my comfort talking about my work-related feelings/emotions in general
40	2022-03-10 10:11:13	Anesthesia	35-40	Woman	5-10	Yes	Yes	Yes	Somewhat positive impact	Very satisfied		Yes, would highly recommend	Lack of time;		High	Yes	1	Very helpful	Made me feel less alone Validated my feelings Provided reassurance that I am supported and things will get better	Significant improvement	Yes	It made me much more comfortable talking about my work-related feelings/emotions in general
41	2022-03-10 10:54:41	ICU	35-40	Woman	5-10	Yes	Yes	No	Somewhat positive impact	Very satisfied		Yes, would highly recommend	Lack of time;		Moderate	Yes	1	Very helpful		Some improvement	No	It made me somewhat more comfortable talking about my work-related feelings/emotions in general
42	2022-03-10 10:55:12	ICU	40-45	Man	5-10	Yes	No	No	Somewhat positive impact	Very satisfied	While I have not utilized the POST program, I greatly appreciate its existence.	Yes, would highly recommend		Make it mandatory for an annual check in, have it scheduled and billable on timesheet for 0.25 units.	Moderate	No, a peer supporter has never reached out to me
43	2022-03-10 11:01:06	Anesthesia	40-45	Man	5-10	No
44	2022-03-10 12:07:44	ICU	30-35	Woman	0-5	Yes	No	No	Neutral	Very satisfied		Yes, would highly recommend	Don't feel like I need it;		Low	No, a peer supporter has never reached out to me
45	2022-03-10 13:52:48	Anesthesia	40-45	Woman	10-20	Yes	No	No	Somewhat positive impact	Satisfied		Yes, would recommend	Lack of time;		High	Yes	1	Helpful	Just having someone reach out to acknowledge that I'd been involved in a difficult case felt comforting. They were checking to make sure I was feeling ok, after that case.	Some improvement	No	It made me somewhat more comfortable talking about my work-related feelings/emotions in general
46	2022-03-10 14:17:21	ICU	55-60	Man	10-20	Yes	Yes	No	Neutral	Neutral		Yes, would recommend	Lack of time;		High	No, a peer supporter has never reached out to me
47	2022-03-11 10:12:08	Anesthesia	40-45	Woman	10-20	Yes	No	No	Neutral	Unsatisfied		No, would not recommend	Privacy concerns;Lack of time;		Low	No, a peer supporter has never reached out to me
48	2022-03-11 10:23:15	Anesthesia	35-40	Man	5-10	No
49	2022-03-11 13:17:24	Anesthesia	50-55	Woman	10-20	Yes	No	No	Somewhat positive impact	Satisfied		Yes, would highly recommend	Lack of time;		High	Yes	3	Somewhat helpful		Some improvement	No	It did not change my comfort talking about my work-related feelings/emotions in general
50	2022-03-11 13:39:07	Anesthesia	40-45	Woman	10-20	Yes	No	No	Somewhat positive impact	Neutral		Yes, would recommend	Lack of time;		Moderate	No, a peer supporter has never reached out to me
51	2022-03-12 11:46:47	Emergency Medicine	45-50	Man	10-20	Yes	No	No	Somewhat positive impact	Satisfied		Yes, would recommend	Don't feel like I need it;		Low	Yes	1	Somewhat helpful	The POST peer supporters in the EM group are incredibly emotionally intelligent, amazing listeners, and provide safe space for discussion, but I still often find it more therapeutic to discuss these work related issues with the small handful of colleagues from work that I am very close friends with.	No change	Yes	It made me somewhat more comfortable talking about my work-related feelings/emotions in general
52	2022-03-13 17:22:15	ICU	35-40	Man	0-5	Yes	No	No	Neutral	Satisfied		Yes, would highly recommend	Don't feel like I need it;		Low	No, a peer supporter has never reached out to me
53	2022-03-14 12:50:33	Anesthesia	45-50	Man	10-20	Yes	No	No			I know of the program, but I don't know if anyone has used it.	Yes, would recommend	Don't feel like I need it;		Low	No, a peer supporter has never reached out to me
54	2022-03-16 08:17:23	OBGYN	50-55	Woman	20-30	Yes		Yes	Somewhat positive impact	Satisfied	am hoping that my dept will become more engaged over time	Yes, would highly recommend	Not comfortable talking about my feelings with colleagues;Lack of time;	am already accessing, using and referring others to this program	Low	Yes	5+	Very helpful	felt supported, knew interaction was confidential	Some improvement	No	It made me much more comfortable talking about my work-related feelings/emotions in general	need the right post suporter	hard to attend f/u meetings given so many conflicts with lunchtime meetings
55	2022-03-16 08:18:44	OBGYN	45-50	Woman	10-20	Yes	Yes	No	Somewhat positive impact	Satisfied	Needs auto referral guideline	Yes, would highly recommend	Privacy concerns;Lack of time;		Very High	No, a peer supporter has never reached out to me
56	2022-03-16 08:36:06	OBGYN	40-45	Woman	5-10	Yes	Yes	No	Neutral	Neutral	Haven't had the opportunity to explore it	Yes, would recommend	Lack of time;Privacy concerns;Med-Legal concerns;	Block time to do it	Moderate	No, a peer supporter has never reached out to me								Thanks for the service
57	2022-03-16 09:14:24	OBGYN	40-45	Woman	10-20	Yes	Yes	Yes	Somewhat positive impact	Satisfied		Yes, would recommend	Lack of time;		High	Yes	1	Very helpful	Unbiased, supportive, neutral	Significant improvement	Yes	It made me somewhat more comfortable talking about my work-related feelings/emotions in general
58	2022-03-16 09:18:43	OBGYN	55-60	Woman	30+	No
59	2022-03-16 10:15:56	HBS	45-50	Man	10-20	Yes	No	Yes	Very positive impact	Very satisfied	I really enjoy the time with colleagues and I feel it improves my personal wellness and JAMM. I am extremely appreciative of the financial compensation because it means that my JAMM is valued by TPMG and my wellness does not come at the expense of my personal time with my family. Thank you for this program.	Neutral	Lack of time;		High	Yes	5+	Very helpful	I think Meeting off campus with a colleague to discuss work related concerns is helpful and increases camaraderie and esprit d’ corps.	Some improvement	No	It made me much more comfortable talking about my work-related feelings/emotions in general
60	2022-03-16 14:37:29	Emergency Medicine	30-35	Woman	0-5	Yes	Yes	Yes	Very positive impact	Very satisfied		Yes, would highly recommend	Don't feel like I need it;Lack of time;		Moderate	Yes	5+	Very helpful		Significant improvement	No	It made me much more comfortable talking about my work-related feelings/emotions in general
61	2022-03-16 15:08:21	Emergency Medicine	50-55	Woman	20-30	Yes	Yes	No	Somewhat positive impact	Satisfied	Great program.	Yes, would highly recommend	Lack of time;		High	No, a peer supporter has never reached out to me
62	2022-03-16 19:47:20	Emergency Medicine	45-50	Man	10-20	Yes	No	No	Very positive impact	Very satisfied	Incredibly supportive and lowers bar for providers to ask for/get help.	Yes, would highly recommend	Don't feel like I need it;		Low	No, a peer supporter has reached out to me but I declined
63	2022-03-17 10:58:15	Anesthesia	50-55	Man	10-20	Yes	No	No	Neutral	Neutral		Yes, would recommend	Don't feel like I need it;		High	No, a peer supporter has reached out to me but I declined
64	2022-03-17 12:25:22	OBGYN	60-65	Woman	30+	Yes	No	No	Neutral	Neutral		Yes, would recommend	Don't feel like I need it;		Low	No, a peer supporter has reached out to me but I declined
65	2022-03-17 13:27:33	Emergency Medicine	40-45	Woman	10-20	Yes	Yes	No	Neutral	Neutral	The story telling is enormously helpful. I think it's weird to get a "random" reach out from someone on the POST team. It happened to me, got a call from someone who would never otherwise call me. I felt the need to clarify-- are you calling as my friend or as a POST person? I wish that person had specified "I'm calling as a POST supporter... I heard you had a hard case" . Unfortunately for the m…	Neutral	Privacy concerns;Not comfortable talking about my feelings with colleagues;	Possibly talking with someone outside the program. Knowing of any fruitful items that come from the program. ie structural/system changes/ what happens at the meetings, etc	Moderate	Yes	2	Negatively impacted me	see above. It's almost like the POST person needs some kind of qualifying statement so we are aware of where they are coming from. "hi - im reaching out to you as a POST person....etc... X someone observed you had a challenging case or a rough day..."	No change	No	It did not change my comfort talking about my work-related feelings/emotions in general		I would love to hear about the successes of this program. Are you able to quantify? Or provide qualitative information? What's measurable? Or maybe it isn't.
66	2022-03-21 09:16:18	Anesthesia	50-55	Woman	10-20	Yes	No	No	Somewhat positive impact	Satisfied		Yes, would recommend			High	Yes	2	Helpful	First time was a little awkward as I knew that the provider was also suffering from incredible burnout and stress so I felt bad burdening them with an emotional data dump. The second time was more informal and felt more natural and supportive.	Some improvement	No	It made me somewhat more comfortable talking about my work-related feelings/emotions in general
67	2022-03-21 09:57:04	Anesthesia	40-45	Woman	5-10	No
68	2022-03-21 11:58:56	Anesthesia	45-50	Woman	10-20	No
69	2022-03-21 13:29:50	Anesthesia	40-45	Man	10-20	Yes	Yes	No	Somewhat positive impact			Yes, would recommend	Lack of time;		Very High	No, a peer supporter has never reached out to me
70	2022-03-21 13:34:32	Anesthesia	35-40	Woman	5-10	Yes	No	No	Somewhat positive impact	Satisfied	I appreciated that someone reached out to me from the program after a difficult situation	Yes, would recommend			High	No, a peer supporter has reached out to me but I declined
71	2022-03-21 14:02:22	Anesthesia	30-35	Woman	0-5	Yes	No	No	Neutral	Neutral	I completely forgot about it after I had learned about it	Neutral	Lack of time;Privacy concerns;		Moderate	No, a peer supporter has never reached out to me
72	2022-03-21 17:16:57	OBGYN	70+	Woman	30+	No
73	2022-03-21 18:05:04	OBGYN	35-40	Woman	5-10	Yes	No	No	Neutral	Neutral	I know that it's there but haven't sought assistance or referred anyone, so I lack experience with it	Neutral	Don't feel like I need it;	I have excellent support from my colleagues in my clinic and am able to vent and run cases as needed with them	Moderate	No, a peer supporter has never reached out to me								n/a
74	2022-03-22 12:00:43	Anesthesia	45-50	Man	10-20	Yes	No	No	Neutral	Neutral		Yes, would recommend	Lack of time;		Low	No, a peer supporter has never reached out to me
75	2022-03-25 17:05:29	Anesthesia	40-45	Man	5-10	No
