# Supplementary material for: Implementation and effectiveness of a physician-focused peer support program
Source: PLoS One. 2023 Nov 1;18(11):e0292917. doi: 10.1371/journal.pone.0292917 (PMC10619771; doi:10.1371/journal.pone.0292917)
Supplement: S2 File — (XLSX) [file pone.0292917.s003.xlsx]

## Sheet: Microsoft Record Keeping Form D
What date was this POST interaction?	What is your Department?	How long was this interaction (in minutes?)
2020-11-10	OBGYN	60
2020-11-22	OBGYN	20
2020-12-02	OBGYN	50
2020-12-04	OBGYN	90
2020-12-05	HBS	60
2020-12-10	Emergency Medicine	60
2020-12-12	OBGYN	15
2020-12-14	Emergency Medicine	35
2020-12-15	Emergency Medicine	60
2020-12-16	Emergency Medicine	45
2020-12-16	Emergency Medicine	60
2020-12-16	Emergency Medicine	60
2020-12-17	Emergency Medicine	60
2020-12-22	Emergency Medicine	45
2020-12-29	Emergency Medicine	60
2020-12-31	Emergency Medicine	30
2021-01-04	Emergency Medicine	60
2021-01-07	Emergency Medicine	45
2021-01-07	Emergency Medicine	45
2021-01-08	Emergency Medicine	60
2021-01-08	HBS	60
2021-01-13	Emergency Medicine	60
2021-01-19	Emergency Medicine	90
2021-01-19	Emergency Medicine	75
2021-01-22	HBS	60
2021-01-22	Emergency Medicine	45
2021-01-22	Anesthesia	90
2021-02-05	Emergency Medicine	30
2021-02-08	HBS	90
2021-02-09	Emergency Medicine	30
2021-02-10	Emergency Medicine	60
2021-02-11	AFM	60
2021-02-17	AFM	60
2021-02-22	Emergency Medicine	60
2021-02-24	Emergency Medicine	60
2021-02-26	Emergency Medicine	30
2021-03-06	HBS	120
2021-03-11	Emergency Medicine	120
2021-03-17	AFM	45
2021-03-30	Emergency Medicine	60
2021-03-31	Emergency Medicine	120
2021-04-01	Emergency Medicine	30
2021-04-01	Emergency Medicine	35
2021-04-05	Emergency Medicine	30
2021-04-05	Emergency Medicine	60
2021-04-22	Emergency Medicine	60
2021-04-23	Emergency Medicine	90
2021-04-24	Emergency Medicine	120
2021-05-03	Anesthesia	20
2021-05-06	HBS	60
2021-05-18	Emergency Medicine	120
2021-05-21	Emergency Medicine	30
2021-05-25	Emergency Medicine	120
2021-06-03	Emergency Medicine	120
2021-06-07	Emergency Medicine	60
2021-06-11	Emergency Medicine	90
2021-06-14	Emergency Medicine	30
2021-06-14	Emergency Medicine	15
2021-06-15	Emergency Medicine	45
2021-06-15	Emergency Medicine	30
2021-06-16	AFM	60
2021-06-16	Emergency Medicine	120
2021-06-17	Emergency Medicine	60
2021-06-17	Emergency Medicine	30
2021-06-18	Emergency Medicine	30
2021-06-18	Emergency Medicine	30
2021-06-21	HBS	60
2021-06-21	Emergency Medicine	180
2021-06-21	Emergency Medicine	280
2021-06-25	Emergency Medicine	20
2021-06-29	Emergency Medicine	30
2021-07-01	Emergency Medicine	120
2021-07-09	Emergency Medicine	120
2021-07-12	Emergency Medicine	30
2021-07-12	Emergency Medicine	60
2021-07-16	Emergency Medicine	120
2021-07-23	Emergency Medicine	60
2021-07-24	Emergency Medicine	120
2021-07-27	Emergency Medicine	45
2021-07-29	Emergency Medicine	30
2021-08-02	Emergency Medicine	25
2021-08-03	Emergency Medicine	60
2021-08-05	Emergency Medicine	90
2021-08-06	Emergency Medicine	120
2021-08-10	Emergency Medicine	60
2021-08-11	Emergency Medicine	60
2021-08-12	Emergency Medicine	60
2021-08-13	HBS	90
2021-08-17	Emergency Medicine	30
2021-08-18	HBS	60
2021-08-19	HBS	60
2021-08-23	Emergency Medicine	35
2021-08-24	Emergency Medicine	45
2021-08-24	Emergency Medicine	30
2021-08-24	Emergency Medicine	60
2021-08-24	Emergency Medicine	75
2021-08-24	Emergency Medicine	65
2021-08-31	HBS	60
2021-09-12	Emergency Medicine	75
2021-09-13	Emergency Medicine	30
2021-09-14	Emergency Medicine	60
2021-09-14	Emergency Medicine	40
2021-09-16	Emergency Medicine	60
2021-09-20	Emergency Medicine	60
2021-09-22	Emergency Medicine	60
2021-09-24	Emergency Medicine	60
2021-10-05	MFS/HNS	15
2021-10-05	MFS/HNS	30
2021-10-11	Emergency Medicine	60
2021-10-19	Emergency Medicine	90
2021-10-20	Emergency Medicine	60
2021-10-28	Emergency Medicine	120
2021-11-01	Emergency Medicine	60
2021-11-03	Emergency Medicine	30
2021-11-08	Emergency Medicine	45
2021-11-17	Emergency Medicine	60
2021-11-22	Emergency Medicine	30
2021-11-22	Emergency Medicine	90
2021-11-23	Emergency Medicine	30
2021-11-23	Emergency Medicine	120
2021-11-29	Emergency Medicine	60
2021-11-29	Emergency Medicine	69
2021-11-30	Emergency Medicine	60
2021-11-30	Emergency Medicine	60
2021-11-30	Emergency Medicine	30
2021-12-01	Emergency Medicine	45
2021-12-01	Emergency Medicine	60
2021-12-02	Emergency Medicine	60
2021-12-03	Emergency Medicine	45
2021-12-07	Emergency Medicine	30
2021-12-09	AFM	30
2021-12-16	Emergency Medicine	45
2021-12-16	HBS	60
2021-12-17	Emergency Medicine	45
2021-12-17	HBS	60
2021-12-19	Emergency Medicine	60
2021-12-21	AFM	60
2021-12-23	Emergency Medicine	30
2021-12-24	Emergency Medicine	60
2022-01-02	Anesthesia	60
2022-01-04	Emergency Medicine	30
2022-01-05	Emergency Medicine	30
2022-01-10	Emergency Medicine	60
2022-01-12	Anesthesia	25
2022-01-12	Anesthesia	20
2022-01-12	Anesthesia	30
2022-01-12	Anesthesia	60
2022-01-18	Emergency Medicine	45
2022-01-19	HBS	60
2022-01-24	Emergency Medicine	30
2022-01-25	Emergency Medicine	60
2022-01-27	Emergency Medicine	60
2022-01-27	Emergency Medicine	45
2022-01-27	Emergency Medicine	60
2022-01-27	Emergency Medicine	30
2022-02-03	Anesthesia	60
2022-02-11	HBS	60
2022-02-21	Emergency Medicine	60
2022-03-16	AFM	60
2022-03-31	Emergency Medicine	120
2022-04-07	Emergency Medicine	60
2022-04-08	Emergency Medicine	60
2022-04-14	Emergency Medicine	60
2022-04-16	Emergency Medicine	30
2022-04-18	HBS	120
2022-04-19	HBS
2022-04-25	Emergency Medicine	60
2022-04-27	MFS/HNS	10
2022-04-28	Emergency Medicine	60
2022-04-29	Emergency Medicine	30
2022-04-30	HBS	60
2022-05-18	HBS	50
2022-05-18	MFS/HNS	15
2022-05-19	MFS/HNS	30
2022-05-23	Emergency Medicine	30
2022-05-26	Emergency Medicine	90
2022-05-27	Anesthesia	30

## Sheet: Paper Record Keeping Form Data
Year	Month	Number of Interactions Recorded on Paper Record Keeping Form		Specialty	Number of Interactions
2019	6	4		OBGYN	4
2019	7	3		Anesthesia	40
2019	8	3		EM	81
2019	9	3
2019	10	5
2019	11	12
2019	12	7
2020	1	11
2020	2	8
2020	3	4
2020	4	5
2020	5	8
2020	6	4
2020	7	8
2020	8	12
2020	9	11
2020	10	2
2020	11	6
2020	12	13
	Total:	129
